# Supplementary material
Source: MDPI journal article supplement (https://www.mdpi.com/2079-3197/9/12/135)
Supplement: s1 [file s1]

**Supporting Information:**

**Extraction of a first order reduced density matrix  
from a Quantum Monte Carlo electronic density:  
A new tool for studying nondynamic correlation**

Carmelo Naim\* and Claudio Amovilli\*

*Dipartimento di Chimica e Chimica Industriale, Università di Pisa, Via Giuseppe Moruzzi  
13, I-56124 Pisa, Italy*

E-mail: carmelonaim94@gmail.com; claudio.amovilli@unipi.it

**Contents**

|          |                                                                    |             |
|----------|--------------------------------------------------------------------|-------------|
| <b>1</b> | <b>Geometries of the molecules [a.u.]</b>                          | <b>S-2</b>  |
| <b>2</b> | <b>Wavefunction of the QMC calculations</b>                        | <b>S-5</b>  |
| <b>3</b> | <b>The QMC electronic densities</b>                                | <b>S-6</b>  |
| <b>4</b> | <b>Global indicators of correlation for CASSCF and the QMC-Fit</b> | <b>S-8</b>  |
| <b>5</b> | <b>Local indicators of correlation for the QMC-fit</b>             | <b>S-9</b>  |
| <b>6</b> | <b>Unrestricted KS computations</b>                                | <b>S-11</b> |
| <b>7</b> | <b>Fit of the Fermi distribution</b>                               | <b>S-13</b> |

# 1 Geometries of the molecules [a.u.]

beh2(ts)

|    |       |        |        |
|----|-------|--------|--------|
| Be | 0.000 | 0.000  | -2.825 |
| H  | 0.000 | 1.297  | 0.000  |
| H  | 0.000 | -1.297 | 0.000  |

o3

|   |       |         |         |
|---|-------|---------|---------|
| O | 0.000 | 0.000   | 0.437   |
| O | 0.000 | -1.0951 | -0.2185 |
| O | 0.000 | 1.0951  | -0.2185 |

cyclobutadiene(D2H)

|   |          |           |           |
|---|----------|-----------|-----------|
| C | 0.000000 | -1.493225 | -1.262007 |
| C | 0.000000 | 1.493225  | -1.262007 |
| C | 0.000000 | -1.493225 | 1.262007  |
| C | 0.000000 | 1.493225  | 1.262007  |
| H | 0.000000 | -2.935813 | -2.715341 |
| H | 0.000000 | 2.935813  | -2.715341 |
| H | 0.000000 | -2.935813 | 2.715341  |
| H | 0.000000 | 2.935813  | 2.715341  |

cyclobutadiene(D4H)

|   |           |           |           |
|---|-----------|-----------|-----------|
| C | -0.000006 | -1.361449 | -1.361449 |
| C | 0.000006  | 1.361449  | -1.361449 |
| C | 0.000006  | -1.361449 | 1.361449  |
| C | -0.000006 | 1.361449  | 1.361449  |
| H | -0.000008 | -2.788967 | -2.788867 |
| H | 0.00001   | 2.788967  | -2.788867 |
| H | 0.00001   | -2.788967 | 2.788867  |
| H | -0.000008 | 2.788967  | 2.788867  |

m-benzyne

|   |          |           |           |
|---|----------|-----------|-----------|
| C | 0.000000 | 0.000000  | -2.617839 |
| C | 0.000000 | 2.235539  | -1.222452 |
| C | 0.000000 | -2.235539 | -1.222452 |
| H | 0.000000 | 4.054873  | -2.114456 |
| H | 0.000000 | -4.054873 | -2.114456 |
| C | 0.000000 | 2.054945  | 1.374787  |
| C | 0.000000 | -2.054945 | 1.374787  |
| C | 0.000000 | 0.000000  | 2.96302   |
| H | 0.000000 | 0.000000  | 4.978591  |
| H | 0.000000 | 0.000000  | -4.648777 |

o-benzyne

|   |          |           |           |
|---|----------|-----------|-----------|
| C | 0.000000 | 1.181411  | -2.362196 |
| C | 0.000000 | 2.734768  | -0.226435 |
| C | 0.000000 | -1.181411 | -2.362196 |
| H | 0.000000 | 4.757633  | -0.242076 |
| C | 0.000000 | 1.340383  | 1.99887   |
| C | 0.000000 | -2.734768 | -0.226435 |
| H | 0.000000 | 2.311749  | 3.780642  |
| H | 0.000000 | -4.757633 | -0.242076 |
| C | 0.000000 | -1.340383 | 1.99887   |
| H | 0.000000 | -2.311749 | 3.780642  |

p-benzyne

|   |          |           |           |
|---|----------|-----------|-----------|
| C | 0.000000 | -2.285164 | 1.319339  |
| C | 0.000000 | 2.285164  | -1.319339 |
| C | 0.000000 | -2.285164 | -1.319339 |
| C | 0.000000 | 2.285164  | 1.319339  |
| C | 0.000000 | 0.000000  | -2.638679 |
| C | 0.000000 | 0.000000  | 2.638679  |
| H | 0.000000 | -4.063026 | 2.345789  |
| H | 0.000000 | 4.063026  | -2.345789 |
| H | 0.000000 | -4.063026 | -2.345789 |
| H | 0.000000 | 4.063026  | 2.345789  |

psb4

|   |           |           |          |
|---|-----------|-----------|----------|
| C | 7.619405  | 1.239675  | 0.000000 |
| C | 5.077643  | 0.978666  | 0.000000 |
| C | 3.912732  | -1.475747 | 0.000000 |
| C | 1.371368  | -2.052847 | 0.000000 |
| C | -0.611869 | -0.25783  | 0.000000 |
| C | -3.154676 | -0.884354 | 0.000000 |
| C | -5.00956  | 1.004941  | 0.000000 |
| H | 8.510562  | 3.100451  | 0.000000 |
| H | 8.868972  | -0.406958 | 0.000000 |
| H | 3.893446  | 2.671305  | 0.000000 |
| H | 5.221319  | -3.079879 | 0.000000 |
| H | 0.842459  | -4.049964 | 0.000000 |
| H | -0.122821 | 1.752857  | 0.000000 |
| H | -3.730279 | -2.870276 | 0.000000 |
| H | -4.440582 | 2.994071  | 0.000000 |
| H | -8.725158 | 2.047786  | 0.000000 |
| H | -8.196836 | -1.185276 | 0.000000 |
| N | -7.471973 | 0.595043  | 0.000000 |

## 2 Wavefunction of the QMC calculations

In our calculations, we have chosen the trial wavefunction in a Slater-Jastrow form: a combination of Slater determinants multiplied by the Jastrow factor<sup>S1</sup> which takes into account the Coulomb interactions at short distances. Due to the fact that our Hamiltonian does not contain the spin, we can write

$$\psi_T(\vec{r}_1, \dots, \vec{r}_N) = J \sum_k^{N_{det}} d_k D_k^\uparrow(\vec{r}_1, \dots, \vec{r}_{N_{up}}) D_k^\downarrow(\vec{r}_{N_{up}+1}, \dots, \vec{r}_N)$$

where the Jastrow factor  $J$  has the form in the eq. S.1.

$$J = J_A J_B J_C \quad (\text{S.1})$$

It is made by three components:  $J_A$  takes into account the effects of the interaction of the nuclei and the electrons (e-n),  $J_B$  stands for the electronics two-body interaction (e-e), meanwhile  $J_C$  is for the three-body interaction between two electrons and a nucleus. Each factor is parameterized, the full expression of these factors is the following.

$$\ln(J_A) = \sum_k^{atoms} \sum_i^N \left[ \frac{A_0^{(k)} R_{ki}}{1 + A_1^{(k)} R_{ki}} + A_2^{(k)} R_{ki}^2 + A_3^{(k)} R_{ki}^3 + \dots \right]$$

$$\ln(J_B) = \sum_{i < j}^N \left[ \frac{B_0 R_{ij}}{1 + B_1 R_{ij}} + B_2 R_{ij}^2 + B_3 R_{ij}^3 + \dots \right]$$

$$\ln(J_C) = \sum_k^{atoms} \sum_{i < j}^N \sum_{t,s} C_{ij}^{(k)} (R_{ki} + R_{kj})^t R_{ij}^s$$

in which  $R_{ij} = [1 - \exp(-\lambda r_{ij})]/\lambda$ . The parameter  $B_0$  will be 1/2 for two electrons with opposite spins, and 1/4 for electrons with the same spin to satisfy e-e cusp condition. The local energy is calculated at every sampled configuration. The use of this kind of wavefunction guarantees the high accuracy of the method, with a very good description of both dynamic

and nondynamic correlation.

The initial setup of the calculation has been provided by the software GAMESS.<sup>S2</sup> We used a pseudopotential<sup>S3</sup> and the corresponding VTZ basis set, to exclude the core electrons. We determined an initial set of orbitals through an HF calculation and these orbitals have been reoptimized through an appropriate CAS optimization considering the different molecules under investigation. The number of determinants in CASSCF computations is too high for a standard QMC calculation, so we have taken a threshold in order to reduce the number of determinants. The combination of the Slater determinants is then multiplied by the Jastrow factor as in Eq.S.1 above to the fifth order. The optimization of the wavefunction was made through the software CHAMP,<sup>S4</sup> and following the method of Umrigar et collaborators.<sup>S5</sup>

### **3 The QMC electronic densities**

The resulted electronic density for each molecule has been plotted in Fig S1

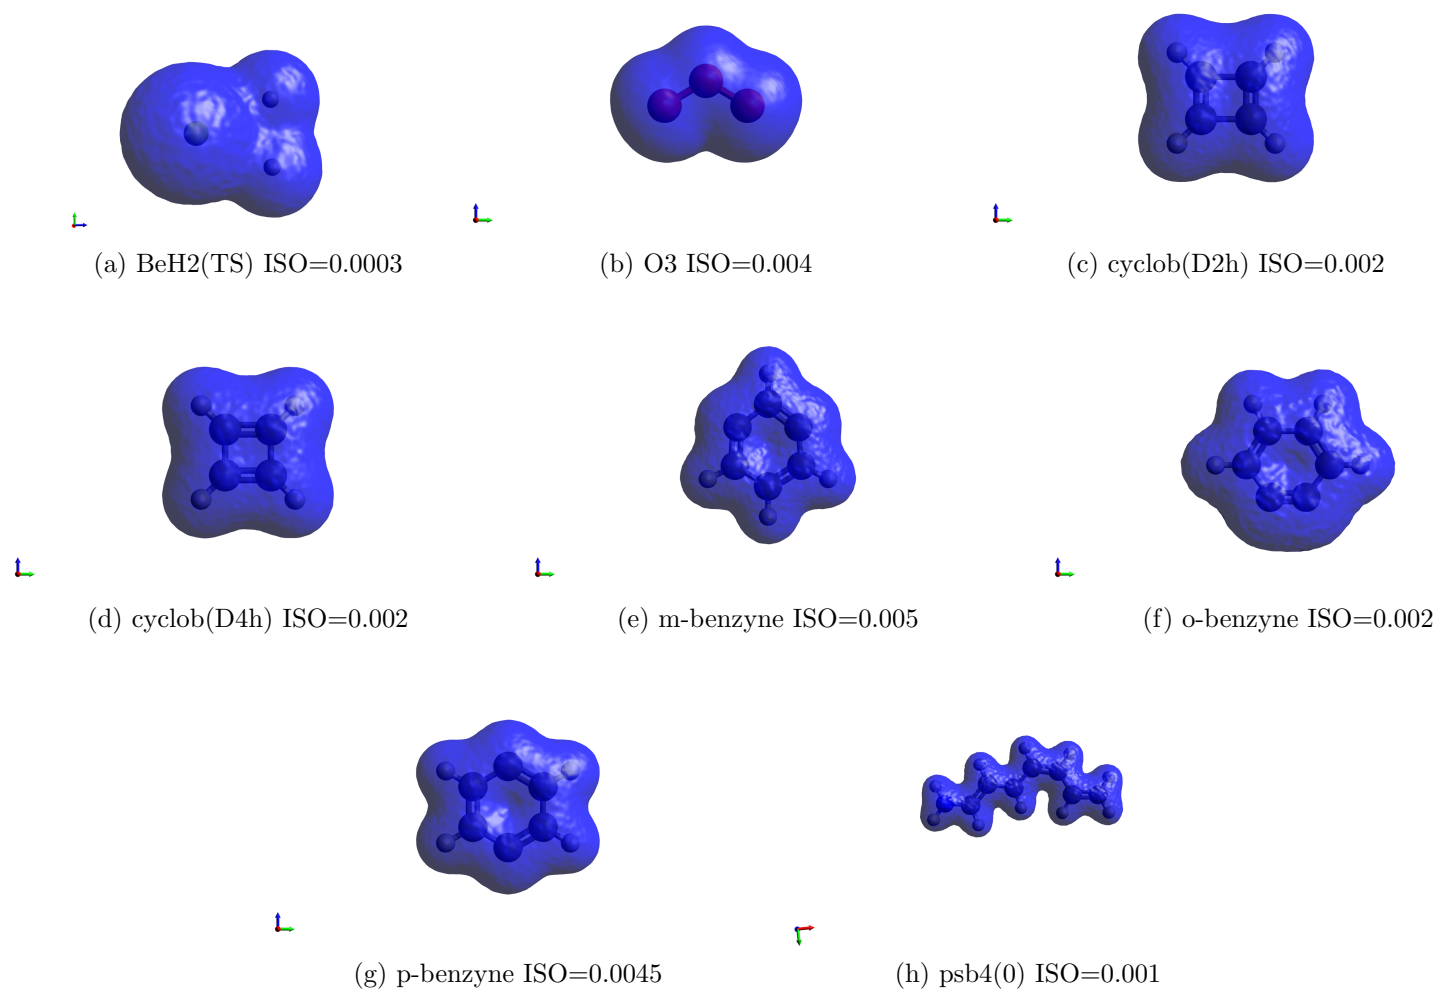

Figure S1: Electronic densities interpolated from QMC samplings.

## 4 Global indicators of correlation for CASSCF and the QMC-Fit

Table S1: Collection of the global indicators of the fit and comparison between CASSCF computations.

| Molecule             | $I_{ND}$ |      | $I_D$ |      |
|----------------------|----------|------|-------|------|
|                      | CAS      | QMC  | CAS   | QMC  |
| Be + H2 (TS)         | 0.65     | 0.50 | 0.25  | 0.12 |
| O3                   | 0.32     | 0.38 | 0.20  | 0.26 |
| cyclobutadiene (D2H) | 0.22     | 0.17 | 0.24  | 0.27 |
| cyclobutadiene (D4H) | 0.59     | 0.52 | 0.12  | 0.18 |
| o-benzyne            | 0.38     | 0.27 | 0.47  | 0.52 |
| m-benzyne            | 0.49     | 0.38 | 0.44  | 0.66 |
| p-benzyne            | 0.74     | 0.43 | 0.36  | 0.13 |
| PSB4                 | 0.29     | 0.16 | 0.45  | 0.72 |



## 5 Local indicators of correlation for the QMC-fit

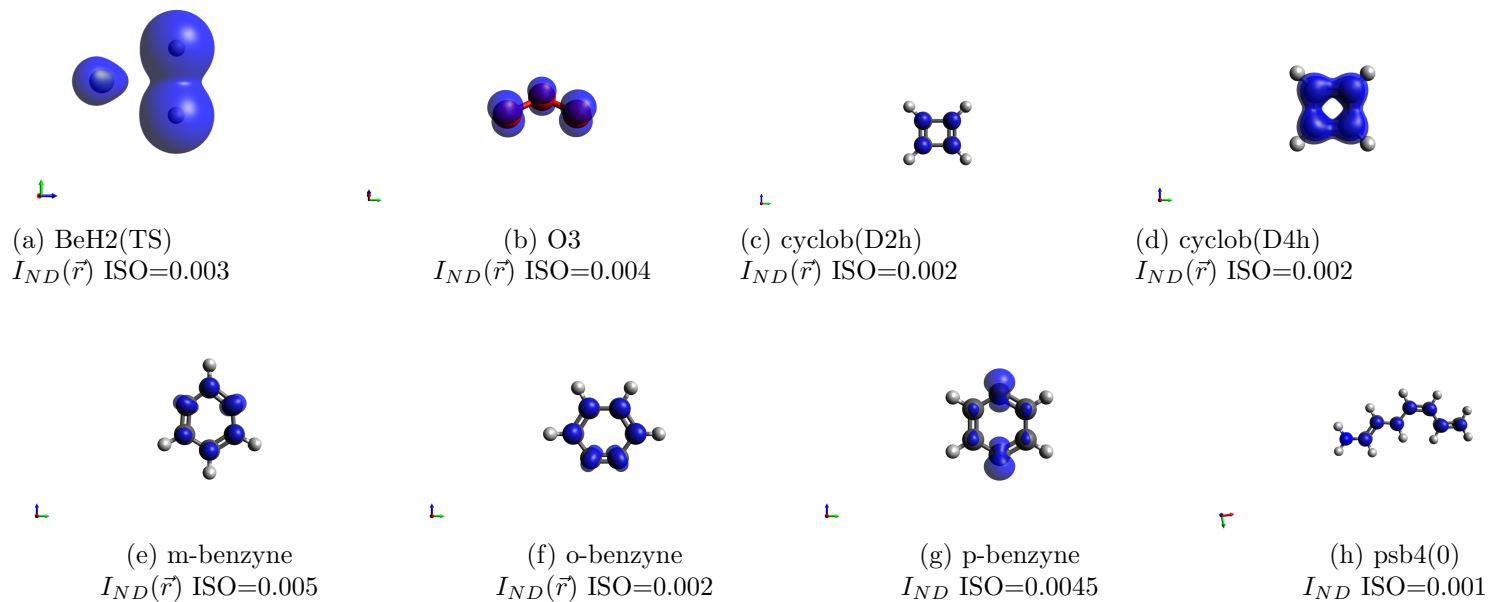

Figure S2: Local indicators of nondynamic correlation ( $I_{ND}(\vec{r})$ ) computed with natural orbitals and occupancies of QMC-fit.

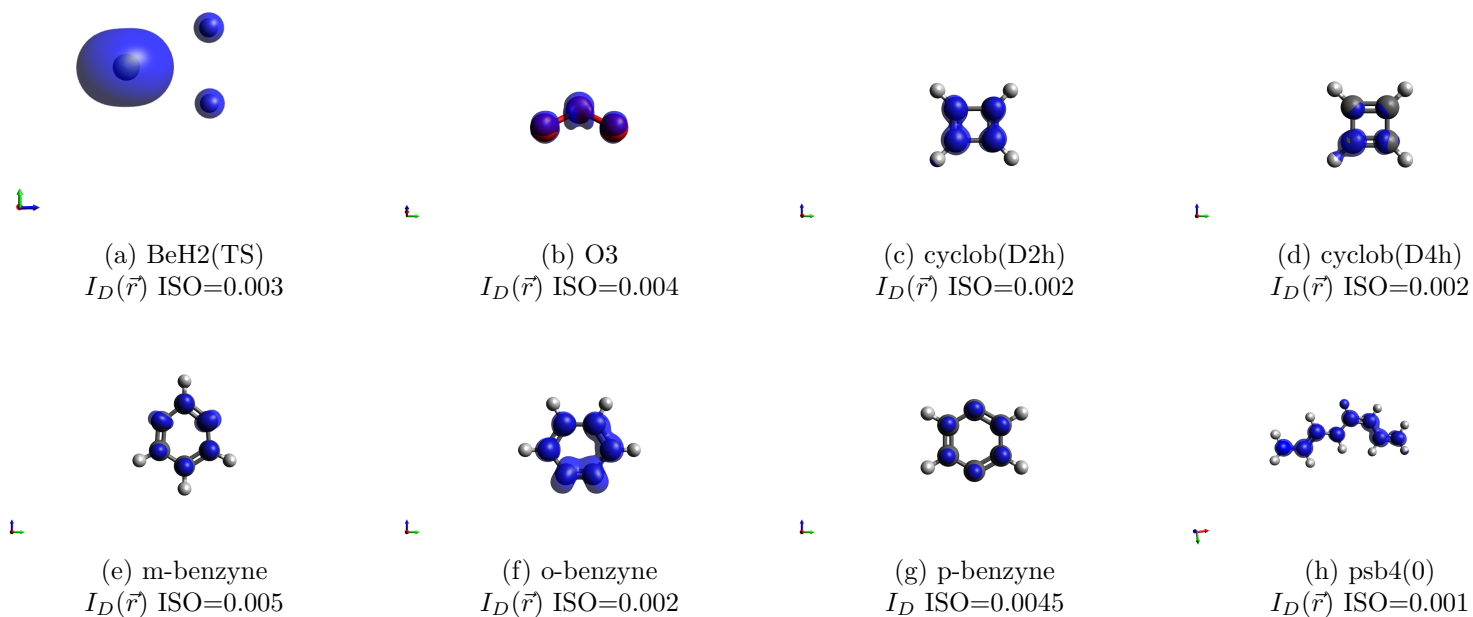

Figure S3: Local indicators of dynamic correlation ( $I_D(\vec{r})$ ) computed with natural orbitals and occupancies of QMC-fit

## 6 Unrestricted KS computations

Table S2: Collection of results of correlation energies and indicators of nondynamic correlation for broken symmetry computations.

| Molecule               | Functional | $S^2$ | $\Delta E^U$ [Kcal/mol] | $I_{ND}$ | $I_{ND}$ |
|------------------------|------------|-------|-------------------------|----------|----------|
| Be+H <sub>2</sub> (TS) | UBLYP      | 0.99  | 26.90                   | 0.50     | 0.06     |
| -                      | UB3LYP     | 1.00  | 25.90                   | 0.50     | 0.07     |
| -                      | UBH&H      | 1.01  | 22.73                   | 0.50     | 0.08     |
| -                      | UM06-2X    | 0.98  | 19.90                   | 0.49     | 0.06     |
| -                      | UCAM-B3LYP | 1.00  | 25.00                   | 0.50     | 0.07     |
| -                      | ULC-BLYP   | 1.02  | 24.70                   | 0.51     | 0.08     |
| -                      | UHF        | 1.09  | 36.00                   | 0.54     | 0.11     |
| O <sub>3</sub>         | UBLYP      | 0.00  | 0.00                    | -        | -        |
| -                      | UB3LYP     | 0.00  | 0.00                    | -        | -        |
| -                      | UBH&H      | 0.00  | 0.00                    | -        | -        |
| -                      | UM06-2X    | 0.00  | 0.00                    | -        | -        |
| -                      | UCAM-B3LYP | 0.00  | 0.00                    | -        | -        |
| -                      | ULC-BLYP   | 0.00  | 0.00                    | -        | -        |
| -                      | UHF        | 0.00  | 0.00                    | -        | -        |
| cyclobutadiene (D2H)   | UBLYP      | 0.00  | 0.00                    | -        | -        |
| -                      | UB3LYP     | 0.16  | 0.20                    | 0.08     | 0.22     |
| -                      | UBH&H      | 0.27  | 0.56                    | 0.13     | 0.27     |
| -                      | UM06-2X    | 0.00  | 0.00                    | -        | -        |
| -                      | UCAM-B3LYP | 0.24  | 0.40                    | 0.17     | 0.25     |
| -                      | ULC-BLYP   | 0.35  | 1.10                    | 0.12     | 0.29     |
| -                      | UHF        | 0.96  | 15.50                   | 0.48     | 0.42     |
| cyclobutadiene (D4H)   | UBLYP      | 1.04  | 24.00                   | 0.52     | 0.19     |
| -                      | UB3LYP     | 1.07  | 27.70                   | 0.53     | 0.21     |
| -                      | UBH&H      | 1.09  | 44.38                   | 0.54     | 0.24     |
| -                      | UM06-2X    | 1.06  | 16.80                   | 0.53     | 0.24     |
| -                      | UCAM-B3LYP | 1.08  | 29.70                   | 0.54     | 0.20     |
| -                      | ULC-BLYP   | 1.11  | 33.00                   | 0.55     | 0.28     |
| -                      | UHF        | 1.25  | 59.40                   | 0.62     | 0.22     |

| Molecule  | Functional | $S^2$ | $\Delta E^U$ [Kcal/mol] | $I_{ND}$ | $I_D$ |
|-----------|------------|-------|-------------------------|----------|-------|
| o-benzyne | UBLYP      | 0.00  | 0.00                    | -        | -     |
| -         | UB3LYP     | 0.01  | 0.00                    | 0.00     | 0.07  |
| -         | UBH&H      | 0.23  | 0.82                    | 0.12     | 0.24  |
| -         | UM06-2X    | 0.00  | 0.00                    | -        | -     |
| -         | UCAM-B3LYP | 0.16  | 0.40                    | 0.08     | 0.20  |
| -         | ULC-BLYP   | 0.31  | 1.50                    | 0.15     | 0.28  |
| -         | UHF        | 1.38  | 24.80                   | 0.69     | 0.64  |
| m-benzyne | UBLYP      | 0.35  | 1.30                    | 0.18     | 0.19  |
| -         | UB3LYP     | 0.61  | 5.80                    | 0.30     | 0.19  |
| -         | UBH&H      | 0.74  | 13.13                   | 0.37     | 0.19  |
| -         | UM06-2X    | 0.70  | 3.80                    | 0.35     | 0.21  |
| -         | UCAM-B3LYP | 0.73  | 11.90                   | 0.36     | 0.17  |
| -         | ULC-BLYP   | 0.81  | 20.50                   | 0.41     | 0.17  |
| -         | UHF        | 0.93  | 45.90                   | 0.47     | 0.61  |
| p-benzyne | UBLYP      | 0.92  | 14.50                   | 0.46     | 0.17  |
| -         | UB3LYP     | 0.98  | 27.40                   | 0.49     | 0.20  |
| -         | UBH&H      | 1.03  | 44.05                   | 0.52     | 0.26  |
| -         | UM06-2X    | 1.03  | 32.90                   | 0.52     | 0.24  |
| -         | UCAM-B3LYP | 1.02  | 40.40                   | 0.51     | 0.23  |
| -         | ULC-BLYP   | 1.07  | 57.40                   | 0.54     | 0.30  |
| -         | UHF        | 1.81  | 109.70                  | 0.91     | 0.61  |
| PBS4      | UBLYP      | 0.00  | 0.00                    | -        | -     |
| -         | UB3LYP     | 0.00  | 0.00                    | -        | -     |
| -         | UBH&H      | 0.00  | 0.00                    | -        | -     |
| -         | UM06-2X    | 0.00  | 0.00                    | -        | -     |
| -         | UCAM-B3LYP | 0.00  | 0.00                    | -        | -     |
| -         | ULC-BLYP   | 0.00  | 0.00                    | -        | -     |
| -         | UHF        | 0.73  | 4.40                    | 0.36     | 0.55  |

## 7 Fit of the Fermi distribution

| Molecule               | Functional | $T_{eff}[K \cdot 10^{-4}]$ | $\delta T_{eff} [\%]$ | $\mu_{eff}[a.u.]$ | $\sqrt{\sigma^2}$ |
|------------------------|------------|----------------------------|-----------------------|-------------------|-------------------|
| Be+H <sub>2</sub> (TS) | QMC        | 2.2(7)                     | 31                    | -0.17(2)          | 2.0E-01           |
|                        | UHF        | 3.3(4)                     | 13                    | -0.126(4)         | 2.2E-02           |
|                        | UB3LYP     | 2.38(3)                    | 1                     | -0.1254(3)        | 2.8E-03           |
|                        | UB&HLYP    | 2.51(7)                    | 3                     | -0.1306(6)        | 5.4E-03           |
|                        | UCAM       | 2.42(6)                    | 3                     | -0.1266(6)        | 5.4E-03           |
|                        | ULC-BLYP   | 2.48(1)                    | 5                     | -0.127(1)         | 1.0E-02           |
|                        | UBLYP      | 2.36(3)                    | 0                     | -0.1249(1)        | 3.0E-04           |
|                        | UM06-2X    | 2.16(2)                    | 1                     | -0.1298(2)        | 2.2E-03           |
| cycloD2H               | QMC        | 2.46(2)                    | 1                     | -0.059(2)         | 4.3E-03           |
|                        | UHF        | 3.59(6)                    | 2                     | -0.083(2)         | 1.1E-02           |
|                        | UB3LYP     | 1.841(6)                   | 0                     | -0.0793(6)        | 1.0E-03           |
|                        | UB&HLYP    | 2.088(8)                   | 0                     | -0.0863(7)        | 1.9E-03           |
|                        | UCAM       | 2.057(8)                   | 0                     | -0.0804(7)        | 1.8E-03           |
|                        | ULC-BLYP   | 2.30(1)                    | 1                     | -0.082(1)         | 3.0E-03           |
|                        | UBLYP      | -                          | -                     | -                 | -                 |
|                        | UM06-2X    | -                          | -                     | -                 | -                 |
| cycloD4H               | QMC        | 2.87(2)                    | 1                     | -0.0712(2)        | 1.4E-03           |
|                        | UHF        | 3.8(1)                     | 4                     | -0.082(3)         | 1.6E-02           |
|                        | UB3LYP     | 2.83(8)                    | 3                     | -0.0794(6)        | 4.5E-03           |
|                        | UB&HLYP    | 2.99(7)                    | 2                     | -0.0854(7)        | 5.0E-03           |
|                        | UCAM       | 2.98(8)                    | 3                     | -0.0804(7)        | 5.4E-03           |
|                        | ULC-BLYP   | 3.17(9)                    | 3                     | -0.0813(9)        | 6.7E-03           |
|                        | UBLYP      | 2.61(8)                    | 3                     | -0.0797(4)        | 3.3E-03           |
|                        | UM06-2X    | 2.71(5)                    | 2                     | -0.0810(3)        | 2.5E-03           |

Table S3: Collection of fit's results of the Fermi distribution of the occupation numbers.

| Molecule  | Functional | $T_{eff}[K \cdot 10^{-4}]$ | $\delta T_{eff} [\%]$ | $\mu_{eff}[a.u.]$ | $\sqrt{\sigma^2}$ |
|-----------|------------|----------------------------|-----------------------|-------------------|-------------------|
| o-benzyne | QMC        | 2.91(4)                    | 1                     | -0.086(3)         | 7.6E-03           |
|           | UHF        | 3.5(2)                     | 5                     | -0.116(9)         | 4.9E-02           |
|           | UB3LYP     | 1.13(4)                    | 3                     | -0.109(7)         | 1.2E-03           |
|           | UB&HLYP    | 2.0(1)                     | 5                     | -0.11(1)          | 2.0E-02           |
|           | UCAM       | 1.86(9)                    | 5                     | -0.10(1)          | 1.4E-02           |
|           | ULC-BLYP   | 2.2(1)                     | 5                     | -0.10(1)          | 2.6E-02           |
|           | UBLYP      | -                          | -                     | -                 | -                 |
|           | UM06-2X    | -                          | -                     | -                 | -                 |
| m-benzyne | QMC        | 2.75(7)                    | 3                     | -0.114(6)         | 2.1E-02           |
|           | UHF        | 3.1(2)                     | 8                     | -0.12(1)          | 6.0E-02           |
|           | UB3LYP     | 2.5(1)                     | 4                     | -0.114(5)         | 2.8E-02           |
|           | UB&HLYP    | 2.7(1)                     | 5                     | -0.122(7)         | 3.8E-02           |
|           | UCAM       | 2.7(1)                     | 5                     | -0.115(7)         | 3.7E-02           |
|           | ULC-BLYP   | 2.9(2)                     | 6                     | -0.117(8)         | 4.5E-02           |
|           | UBLYP      | 2.03(5)                    | 2                     | -0.115(4)         | 1.3E-02           |
|           | UM06-2X    | 2.6(1)                     | 4                     | -0.117(6)         | 3.4E-02           |
| p-benzyne | QMC        | 1.96(7)                    | 4                     | -0.153(2)         | 2.1E-02           |
|           | UHF        | 3.0(2)                     | 6                     | -0.150(6)         | 4.5E-02           |
|           | UB3LYP     | 2.1(1)                     | 7                     | -0.152(4)         | 3.7E-02           |
|           | UB&HLYP    | 2.0(1)                     | 7                     | -0.161(4)         | 4.0E-02           |
|           | UCAM       | 2.1(1)                     | 7                     | -0.154(4)         | 3.9E-02           |
|           | ULC-BLYP   | 2.1(2)                     | 7                     | -0.156(4)         | 4.0E-02           |
|           | UBLYP      | 2.0(1)                     | 5                     | -0.151(3)         | 3.2E-02           |
|           | UM06-2X    | 2.1(2)                     | 7                     | -0.155(4)         | 4.1E-02           |
| O3        | QMC        | 3.9(2)                     | 4                     | -0.260(7)         | 2.8E-02           |
|           | UHF        | -                          | -                     | -                 | -                 |
|           | UB3LYP     | -                          | -                     | -                 | -                 |
|           | UB&HLYP    | -                          | -                     | -                 | -                 |
|           | UCAM       | -                          | -                     | -                 | -                 |
|           | ULC-BLYP   | -                          | -                     | -                 | -                 |
|           | UBLYP      | -                          | -                     | -                 | -                 |
|           | UM06-2X    | -                          | -                     | -                 | -                 |
| PSB4      | QMC        | 2.30(6)                    | 3                     | -0.262(8)         | 1.0E-02           |
|           | UHF        | 5.32(2)                    | 0                     | -0.5405(1)        | 2.1E-03           |
|           | UB3LYP     | -                          | -                     | -                 | -                 |
|           | UB&HLYP    | -                          | -                     | -                 | -                 |
|           | UCAM       | -                          | -                     | -                 | -                 |
|           | ULC-BLYP   | -                          | -                     | -                 | -                 |
|           | UBLYP      | -                          | -                     | -                 | -                 |
|           | UM06-2X    | -                          | -                     | -                 | -                 |

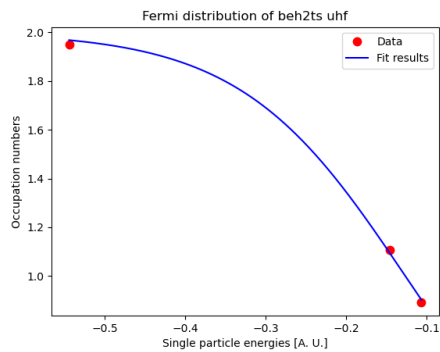

(a)

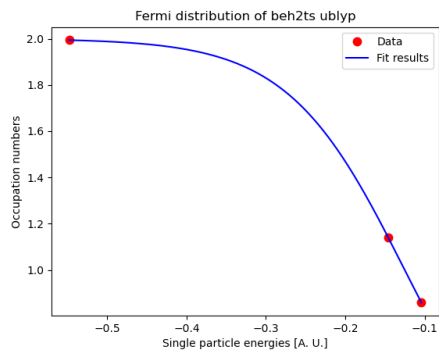

(b)

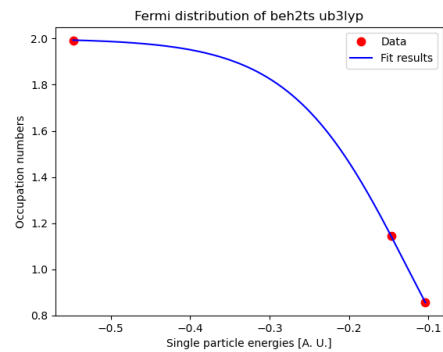

(c)

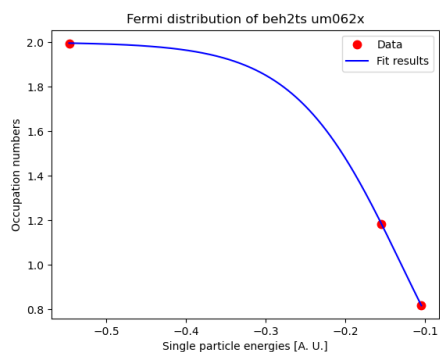

(d)

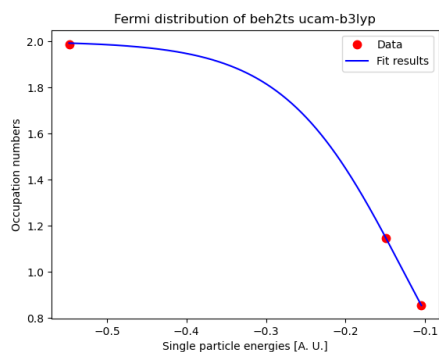

(e)

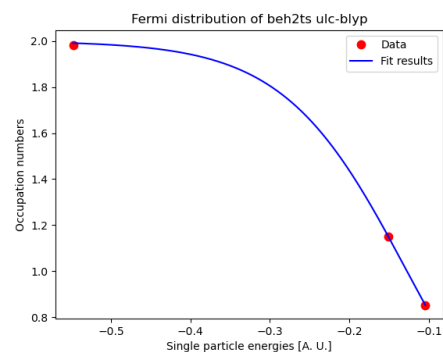

(f)

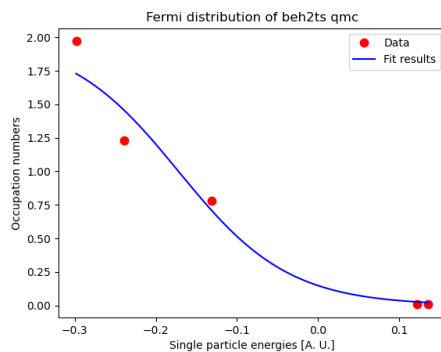

(g)

Figure S4: Fit of the Fermi distribution for BeH<sub>2</sub>(TS) tested for different functionals and QMC.

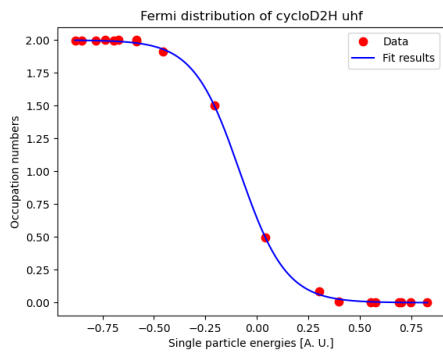

(a)

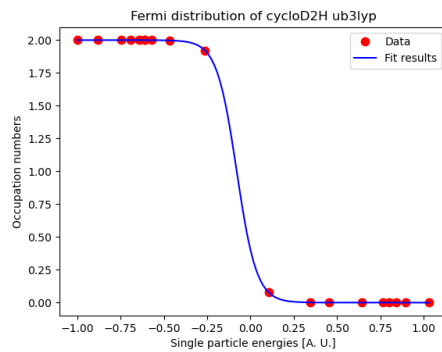

(b)

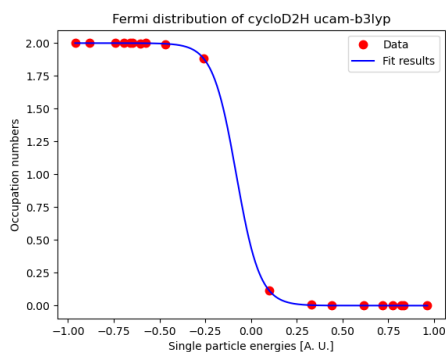

(c)

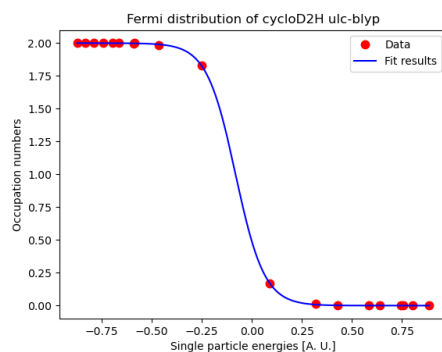

(d)

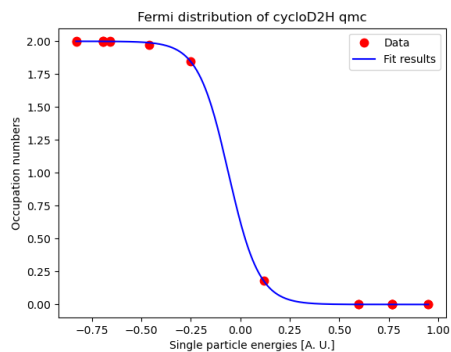

(e)

Figure S5: Fit of the Fermi distribution for the cyclobutadiene (D2h) tested for different functionals and QMC.



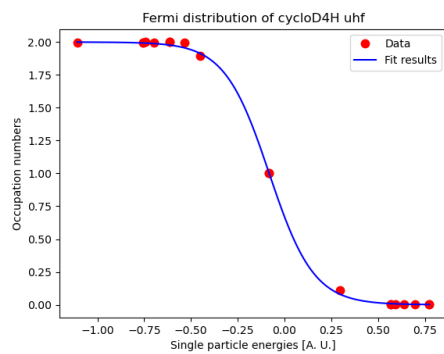

(a)

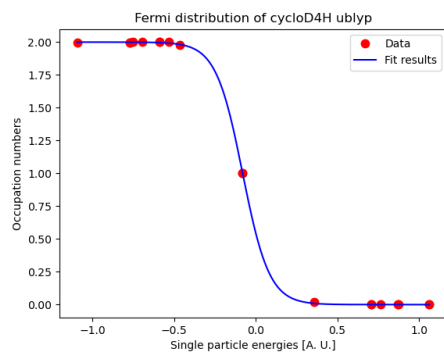

(b)

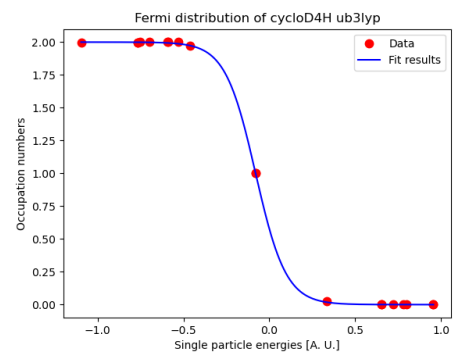

(c)

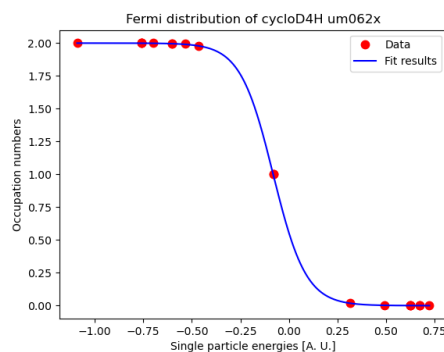

(d)

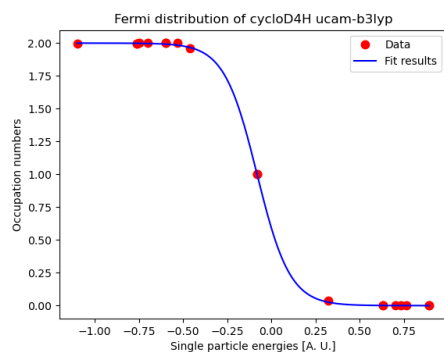

(e)

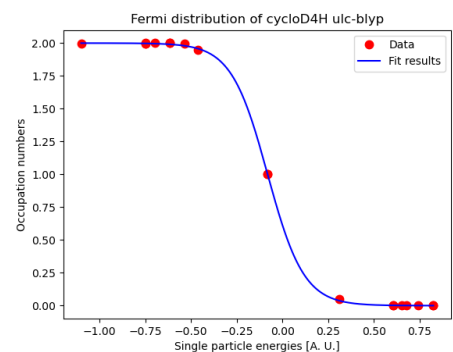

(f)

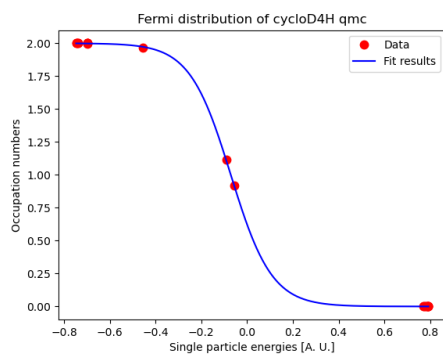

(g)

Figure S6: Fit of the Fermi distribution for the cyclobutadiene (D4h) tested for different functionals and QMC.

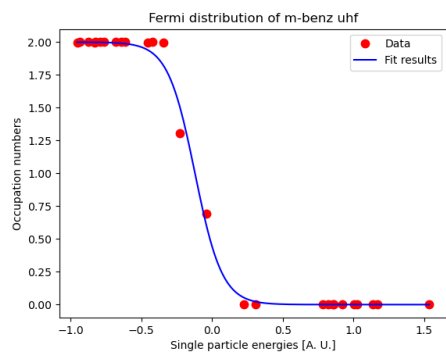

(a)

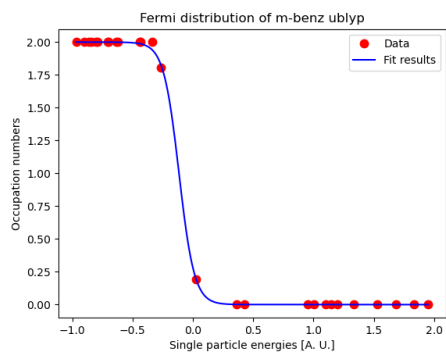

(b)

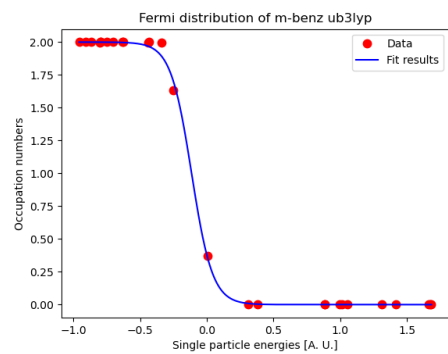

(c)

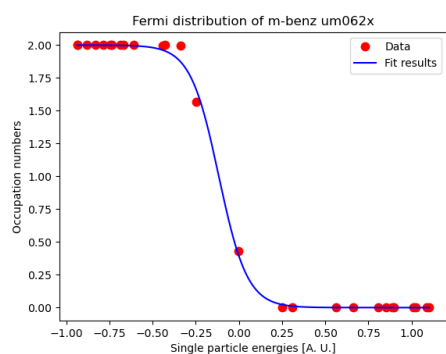

(d)

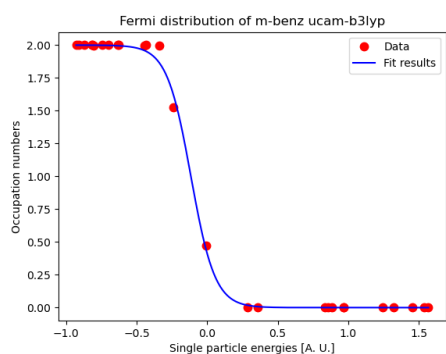

(e)

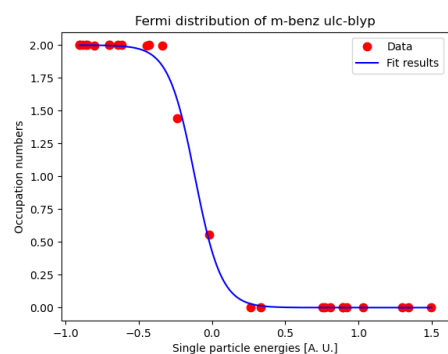

(f)

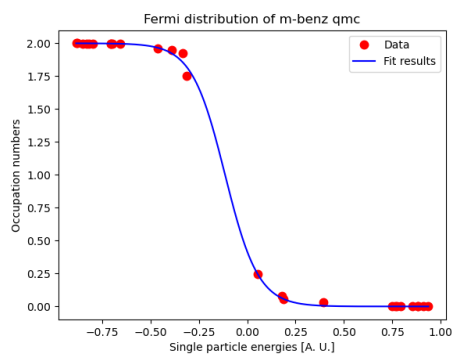

(g)

Figure S7: Fit of the Fermi distribution for the meta-benzynes tested for different functionals and QMC.

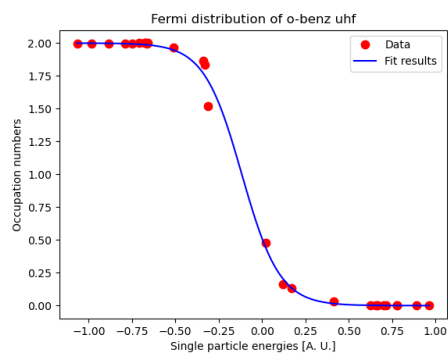

(a)

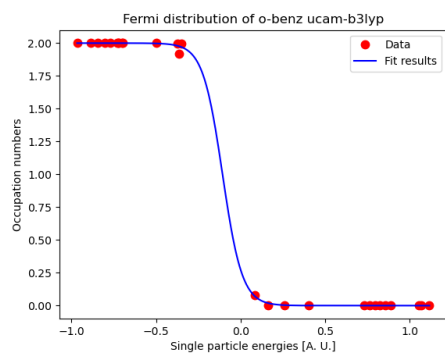

(b)

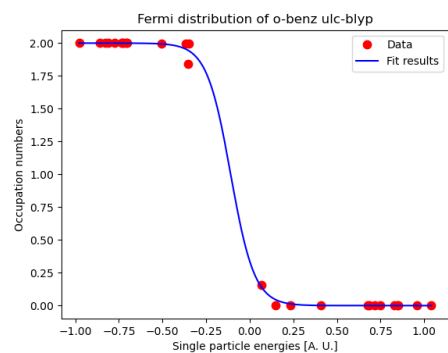

(c)

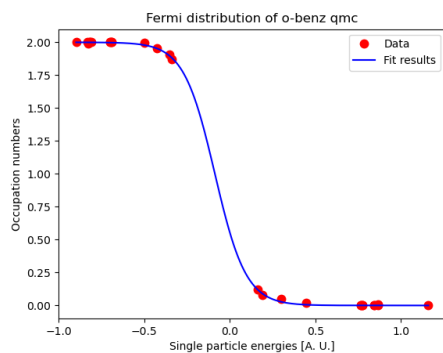

(d)

Figure S8: Fit of the Fermi distribution for the ortho-benzynes tested for different functionals and QMC.

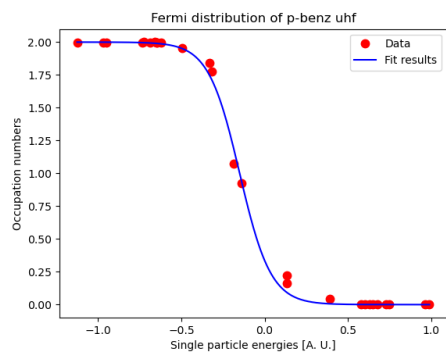

(a)

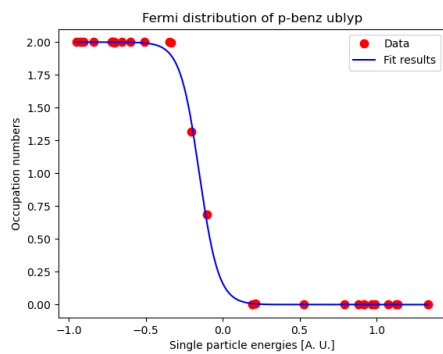

(b)

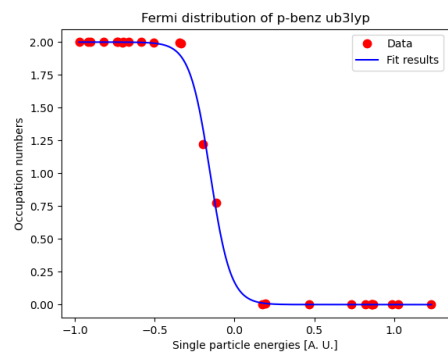

(c)

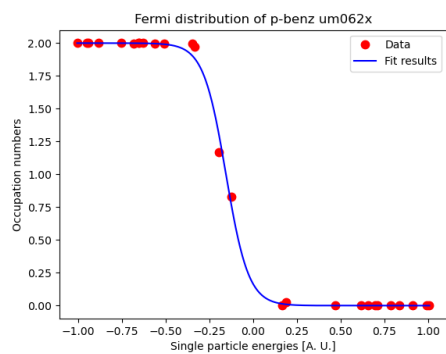

(d)

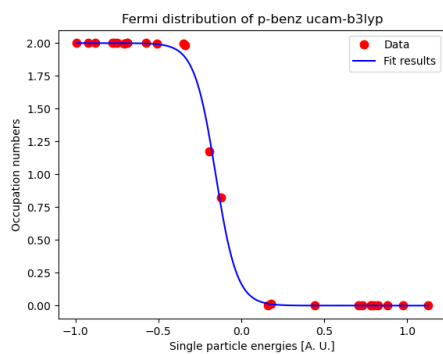

(e)

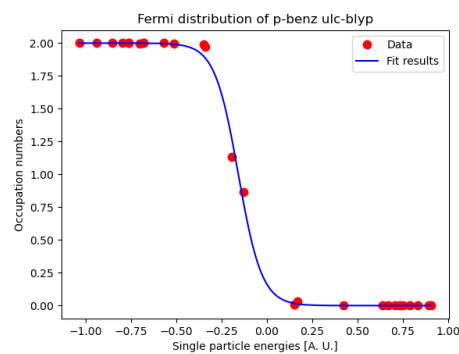

(f)

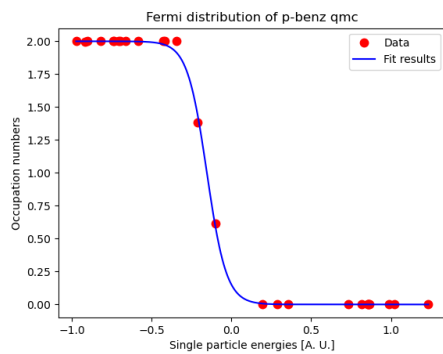

(g)

Figure S9: Fit of the Fermi distribution for the para-benzynes tested for different functionals and QMC.

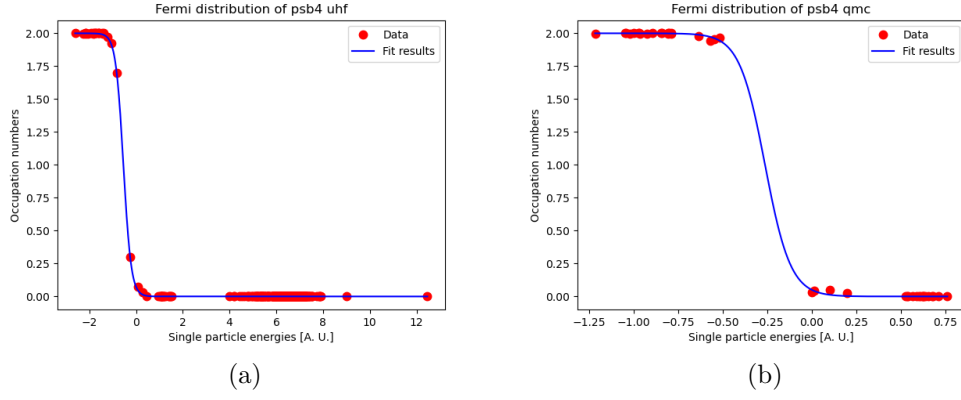

Figure S10: Fit of the Fermi distribution for the psb4(0) tested for different functionals and QMC.

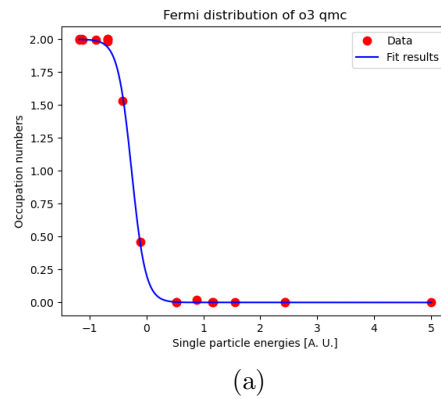

Figure S11: Fit of the Fermi distribution for the O3 tested for QMC-fit.

## References

- (S1) Filippi, C.; Umrigar, C. J. Multiconfiguration wave functions for quantum Monte Carlo calculations of first-row diatomic molecules. *The Journal of Chemical Physics* **1996**, *105*, 213–226.
- (S2) Schmidt, M.; Baldridge, K.; Boatz, J.; Elbert, S.; Gordon, M.; Jensen, J.; Koseki, S.; Matsunaga, N.; Nguyen, K.; Su, S.; Windus, T.; Dupuis, M.; Montgomery, J. General atomic and molecular electronic structure system. *Journal of Computational Chemistry* **1993**,
- (S3) Burkatzki, M.; Filippi, C.; Dolg, M. Energy-consistent pseudopotentials for quantum Monte Carlo calculations. *The Journal of Chemical Physics* **2007**, *126*, 234105.
- (S4) Umrigar, C.; Filippi, C. champ2018. <http://www.utwente.nl/tnw/ccp/research/CHAMP.html>, 2018.
- (S5) Umrigar, C. J.; Toulouse, J.; Filippi, C.; Sorella, S.; Hennig, R. G. Alleviation of the Fermion-Sign Problem by Optimization of Many-Body Wave Functions. *Phys. Rev. Lett.* **2007**, *98*, 110201.
